# Supplementary material
Source: PubMed Central journal article supplement (PMC3393763)

Supplementary Figure 1. Kaplan-Meier estimate of survival function of remaining time to spontaneous HBeAg seroconversion from the first crossing of a threshold value. The ALT threshold values were 60, 80, 150 and 200 IU/L. The solid line is for ALT threshold 60 IU/L, the dashed line for threshold 80 IU/L, the dotted line for threshold 150 IU/L, and the dashed-dotted line for threshold 200 IU/L.

# KM estimate for remaining time to seroconversion under 4 thresholds

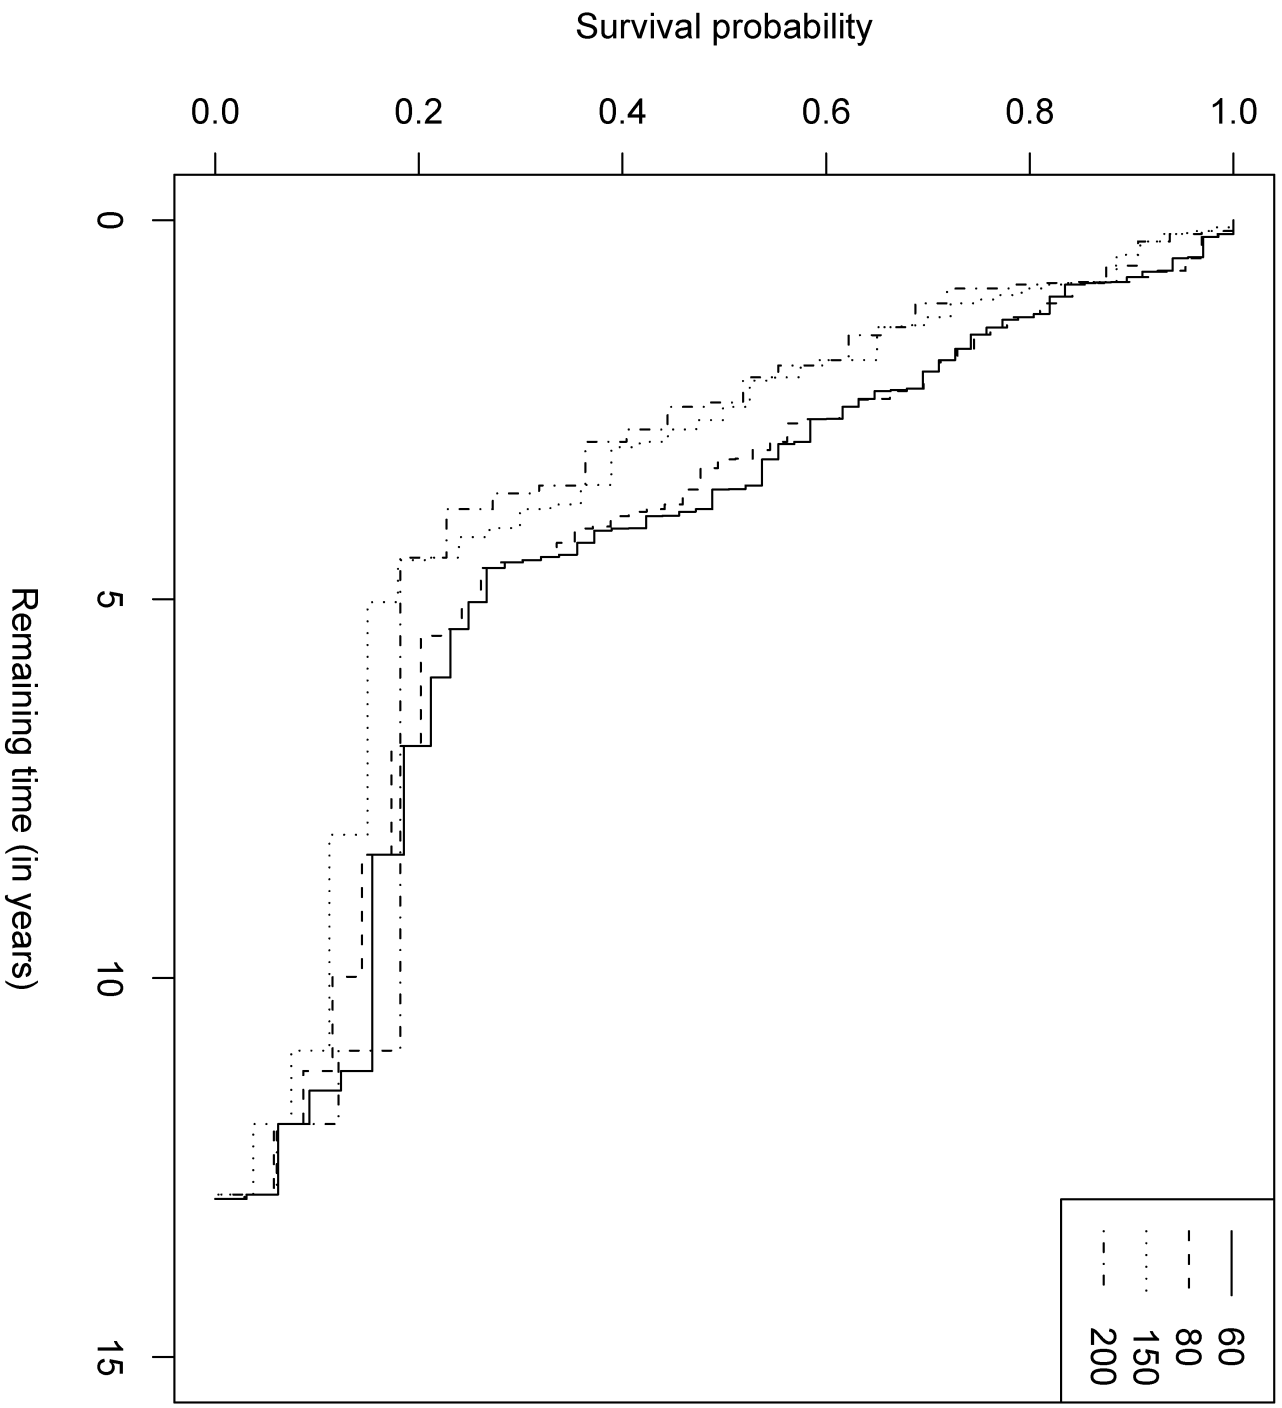

Supplement: NIHMS385481-supplement-Supplementary_Data.pdf [file NIHMS385481-supplement-Supplementary_Data.pdf]
